# Supplementary material for: Food insecurity and associated depression among older adults in India: evidence from a population-based study
Source: HighWire-hosted journal article supplement (doi:10.1136/bmjopen-2021-052718), 2022-04-01
Supplement: bmjopen-2021-052718supp001_data_supplement.pdf [file bmjopen-2021-052718supp001_data_supplement.pdf]

**Table-S1.** Logistic regression estimates for older adults suffering from major depression in India, 2017-18

| Background characteristic | Model-1            | Model-2            |
|---------------------------|--------------------|--------------------|
|                           | UOR (95% CI)       | AOR (95% CI)       |
| <b>Food insecurity</b>    |                    |                    |
| No                        | Ref.               | Ref.               |
| Yes                       | 1.39* (1.27, 1.51) | 2.56* (2.28, 2.88) |

\*if  $p < 0.05$ ; Ref: Reference; UOR: Unadjusted odds ratio; AOR: Adjusted odds ratio; CI: Confidence interval. Model-2 was controlled for individual and household factors; Food insecurity variable was generated using the following five questions: -

1. In the last 12 months, did you ever reduce the size of your meals or skip meals because there was not enough food at your household?
2. In the last 12 months, did you eat enough food of your choice?
3. In the last 12 months, were you hungry but didn't eat because there was not enough food at your household?
4. In the past 12 months did you ever not eat for a whole day because there was not enough food at your household?
5. Do you think that you have lost weight in the last 12 months because there was not enough food at your household?

All the variables were coded as 0 "no" and 1 "yes". Then a summation score of 0-5 was generated using a egen command in STATA. Lastly, the variable was coded as 0 if the summation score was 0 and 1 if the summation score ranges from 1-5. The variable was hence categorized as food insecurity (no and yes).
